# Supplementary material for: ABCA1 and cholesterol transfer protein Aster-A promote an asymmetric cholesterol distribution in the plasma membrane
Source: PubMed Central journal article supplement (PMC9747601; doi:10.1016/j.jbc.2022.102702), 2022-11-14
Supplement: mmc2.pdf [file mmc2.pdf]

|           | group1               | group2   | p value  |          |
|-----------|----------------------|----------|----------|----------|
|           | 0.02% BS/ 10% FBS    |          | 1.38E-06 |          |
| Figure 1B | ABCA1 0.02% BS/ T0   |          | 0        |          |
|           | 0.02% BS/ 25OHC      |          | 3.07E-05 |          |
|           | 0.02% BS/ 10% FBS    |          | 0.448    |          |
|           | Aster-A 0.02% BS/ T0 |          | 6.59E-02 |          |
|           | 0.02% BS/ 25OHC      |          | 0.302    |          |
| Figure 2B | Untreated +Choleste  |          | 4.05E-13 |          |
| 1 h       | ABCA1                | ABCA1(MI | 3.54E-05 |          |
| Figure 3C | 2 h                  | ABCA1    | ABCA1(MI | 3.67E-08 |
|           | 3 h                  | ABCA1    | ABCA1(MI | 2.57E-11 |
|           | 4 h                  | ABCA1    | ABCA1(MI | 5.15E-13 |
|           | 0 U/mL               | 0.2 U/mL | 9.11E-05 |          |
| Figure 4C | 0 U/mL               | 1.0 U/mL | 2.77E-05 |          |
|           | 0 U/mL               | 0.2 U/mL | 1.25E-05 |          |
|           | 0 U/mL               | 1.0 U/mL | 1.66E-05 |          |
| Figure 6B | ABCA1                | ABCA1(MI | 4.18E-07 |          |
| Figure 6D | ABCG1                | ABCG1(KM | 4.67E-08 |          |
|           | 1 h                  | ABCA1    | ABCA1(MI | 5.09E-02 |
|           | 2 h                  | ABCA1    | ABCA1(MI | 3.08E-01 |
| Figure S6 | 3 h                  | ABCA1    | ABCA1(MI | 6.84E-02 |
|           | 4 h                  | ABCA1    | ABCA1(MI | 2.91E-02 |
|           | 5 h                  | ABCA1    | ABCA1(MI | 1.82E-02 |
| Figure S7 | Untreated +SMase     |          | 2.04E-03 |          |
|           | Untreated +SMase     |          | 3.75E-01 |          |
