# Supplementary material for: ABCA1 and cholesterol transfer protein Aster-A promote an asymmetric cholesterol distribution in the plasma membrane
Source: PubMed Central journal article supplement (PMC9747601; doi:10.1016/j.jbc.2022.102702), 2022-11-14
Supplement: mmc3.pdf [file mmc3.pdf]

*hrps18* gatgggcggcggaaa  
cggcccacacccttaatg  
*abca1* aacagtttgtggccctttg  
agttccaggctgggtactt  
*gramd1a* agaccacgatctccatccag  
tttcaagcagtgattctgc
